# Supplementary material for: Investigating the Effect of an Oxytetracycline Treatment on the Gut Microbiome and Antimicrobial Resistance Gene Dynamics in Nile Tilapia (Oreochromis niloticus)
Source: MDPI journal article supplement (doi:10.3390/antibiotics10101213), 2021-10-06
Supplement: s1 [file s1]

**Table S1.** Operational taxonomic units (OTU) identified as discriminatory according to oxytetracycline exposure by Metastats and LEfSe algorithms in Mothur.

| Day | Phylotype |                |                                         | <i>p</i> value |       |
|-----|-----------|----------------|-----------------------------------------|----------------|-------|
|     | OTU       | Phylum         | Genus                                   | Metastats      | LEfSe |
| 8   | Otu0140   | Actinobacteria | <i>Kineosporiaceae_unclassified</i>     | 0.040          | -     |
|     | Otu0237   | Actinobacteria | <i>uncultured_ge</i>                    | 0.027          | -     |
|     | Otu0321   | Actinobacteria | <i>Iamia</i>                            | 0.049          | -     |
|     | Otu0359   | Actinobacteria | <i>Microtrichales_unclassified</i>      | 0.028          | -     |
|     | Otu0802   | Actinobacteria | <i>Microtrichales_unclassified</i>      | 0.046          | -     |
|     | Otu0008   | Bacteroidetes  | <i>uncultured</i>                       | 0.019          | -     |
|     | Otu0308   | Planctomycetes | <i>uncultured</i>                       | 0.041          | -     |
|     | Otu0004   | Proteobacteria | <i>Plesiomonas</i>                      | 0.007          | 0.022 |
|     | Otu0006   | Proteobacteria | <i>Reyranella</i>                       | 0.029          | -     |
|     | Otu0059   | Proteobacteria | <i>Pseudomonas</i>                      | 0.027          | -     |
|     | Otu0163   | Proteobacteria | <i>Uncultured</i>                       | 0.032          | -     |
|     | Otu0005   | Proteobacteria | <i>Aeromonas</i>                        | -              | 0.030 |
|     | Otu0017   | Proteobacteria | <i>Deefgea</i>                          | -              | 0.008 |
|     | Otu0155   | Proteobacteria | <i>Pedomicrobium</i>                    | -              | 0.042 |
|     | Otu0208   | Proteobacteria | <i>Reyranella</i>                       | -              | 0.044 |
| 15  | Otu0065   | Acidobacteria  | <i>DS-100_ge</i>                        | 0.039          | -     |
|     | Otu0010   | Actinobacteria | <i>Nocardioides</i>                     | 0.044          | -     |
|     | Otu0053   | Actinobacteria | <i>Mycobacterium</i>                    | 0.037          | -     |
|     | Otu0609   | Actinobacteria | <i>Corynebacterium</i>                  | 0.026          | -     |
|     | Otu0028   | Bacteroidetes  | <i>Flavobacterium</i>                   | -              | 0.010 |
|     | Otu0062   | Chloroflexi    | <i>RBG-13-54-9_ge</i>                   | 0.031          | -     |
|     | Otu0219   | Chloroflexi    | <i>KD4-96_ge</i>                        | 0.022          | -     |
|     | Otu0434   | Chloroflexi    | <i>S085_ge</i>                          | 0.046          | -     |
|     | Otu0945   | Chloroflexi    | <i>JG30-KF-CM45_ge</i>                  | 0.034          | -     |
|     | Otu0750   | Firmicutes     | <i>Lactobacillales_unclassified</i>     | 0.028          | -     |
|     | Otu2501   | Firmicutes     | <i>Bacillales_unclassified</i>          | 0.024          | -     |
|     | Otu0018   | Proteobacteria | <i>Desulfovibrionaceae_unclassified</i> | 0.028          | -     |
|     | Otu0024   | Proteobacteria | <i>Hyphomicrobium</i>                   | 0.030          | -     |
|     | Otu0044   | Proteobacteria | <i>Aquicella</i>                        | 0.013          | -     |
|     | Otu0051   | Proteobacteria | <i>Rhodobacteraceae_unclassified</i>    | 0.006          | -     |
|     | Otu0098   | Proteobacteria | <i>Rhizobiales_unclassified</i>         | 0.014          | -     |
|     | Otu0113   | Proteobacteria | <i>Methylobacteriaceae_unclassified</i> | 0.048          | -     |
|     | Otu0116   | Proteobacteria | <i>Rhizobiales_unclassified</i>         | 0.004          | -     |
|     | Otu0136   | Proteobacteria | <i>Sphingomonadaceae_unclassified</i>   | -              | 0.032 |
|     | Otu0169   | Proteobacteria | <i>Pseudorhodoplanes</i>                | 0.020          | -     |
|     | Otu0187   | Proteobacteria | <i>Stenotrophomonas</i>                 | 0.028          | -     |
|     | Otu0196   | Proteobacteria | <i>Rhodobacteraceae_unclassified</i>    | 0.016          | -     |
|     | Otu0246   | Proteobacteria | <i>Alphaproteobacteria_unclassified</i> | 0.037          | -     |

**Table S1. Continued**

| Day | Phylotype |                       |                                         | <i>p</i> value |       |
|-----|-----------|-----------------------|-----------------------------------------|----------------|-------|
|     | OTU       | Phylum                | Genus                                   | Metastats      | LEfSe |
| 22  | Otu0065   | Acidobacteria         | <i>DS-100_ge</i>                        | 0.028          | -     |
|     | Otu0063   | Actinobacteria        | <i>Smaragdicoccus</i>                   | 0.014          | -     |
|     | Otu0217   | Actinobacteria        | <i>uncultured_ge</i>                    | 0.042          | -     |
|     | Otu0582   | Actinobacteria        | <i>Corynebacterium_1</i>                | 0.038          | -     |
|     | Otu0685   | Actinobacteria        | <i>Nocardioides</i>                     | 0.044          | -     |
|     | Otu1031   | Actinobacteria        | <i>Mycobacterium</i>                    | 0.024          | -     |
|     | Otu0132   | Bacteria_unclassified | <i>Bacteria_unclassified</i>            | 0.033          | -     |
|     | Otu0505   | Bacteria_unclassified | <i>Bacteria_unclassified</i>            | 0.029          | -     |
|     | Otu0782   | Bacteria_unclassified | <i>Bacteria_unclassified</i>            | 0.030          | -     |
|     | Otu1130   | Bacteria_unclassified | <i>Bacteria_unclassified</i>            | 0.030          | -     |
|     | Otu0020   | Bacteroidetes         | <i>Macellibacteroides</i>               | 0.024          | -     |
|     | Otu0435   | Chlamydiae            | <i>Chlamydiales_unclassified</i>        | 0.013          | -     |
|     | Otu0544   | Chlamydiae            | <i>Chlamydia</i>                        | 0.017          | -     |
|     | Otu1093   | Chlamydiae            | <i>Parachlamydiaceae_unclassified</i>   | 0.040          | -     |
|     | Otu0012   | Chloroflexi           | <i>uncultured</i>                       | 0.029          | -     |
|     | Otu0058   | Chloroflexi           | <i>JG30-KF-CM45_ge</i>                  | 0.021          | -     |
|     | Otu0219   | Chloroflexi           | <i>KD4-96_ge</i>                        | 0.044          | -     |
|     | Otu0976   | Cyanobacteria         | <i>Obscuribacterales_ge</i>             | 0.021          | -     |
|     | Otu0002   | Fusobacteria          | <i>Cetobacterium</i>                    | 0.004          | -     |
|     | Otu0073   | Planctomycetes        | <i>Planctopirus</i>                     | 0.018          | -     |
|     | Otu0080   | Planctomycetes        | <i>uncultured</i>                       | 0.006          | -     |
|     | Otu0121   | Planctomycetes        | <i>Gemmataceae_unclassified</i>         | 0.027          | -     |
|     | Otu0221   | Planctomycetes        | <i>uncultured</i>                       | 0.004          | -     |
|     | Otu0238   | Planctomycetes        | <i>uncultured</i>                       | 0.035          | -     |
|     | Otu0262   | Planctomycetes        | <i>Gemmata</i>                          | 0.011          | -     |
|     | Otu0478   | Planctomycetes        | <i>Pirellulaceae_unclassified</i>       | 0.011          | -     |
|     | Otu0574   | Planctomycetes        | <i>uncultured</i>                       | 0.003          | -     |
|     | Otu0588   | Planctomycetes        | <i>Gemmata</i>                          | 0.002          | -     |
|     | Otu0626   | Planctomycetes        | <i>uncultured</i>                       | 0.007          | -     |
|     | Otu0005   | Proteobacteria        | <i>Aeromonas</i>                        | 0.006          | -     |
|     | Otu0006   | Proteobacteria        | <i>Reyranella</i>                       | 0.013          | -     |
|     | Otu0024   | Proteobacteria        | <i>Hyphomicrobium</i>                   | 0.005          | -     |
|     | Otu0034   | Proteobacteria        | <i>Novosphingobium</i>                  | 0.045          | -     |
|     | Otu0036   | Proteobacteria        | <i>Bradyrhizobium</i>                   | 0.045          | -     |
|     | Otu0046   | Proteobacteria        | <i>Proteobacteria_unclassified</i>      | 0.013          | -     |
|     | Otu0048   | Proteobacteria        | <i>Rhodobacteraceae_unclassified</i>    | 0.043          | -     |
|     | Otu0051   | Proteobacteria        | <i>Rhodobacteraceae_unclassified</i>    | 0.047          | -     |
|     | Otu0116   | Proteobacteria        | <i>Rhizobiales_unclassified</i>         | 0.019          | -     |
|     | Otu0150   | Proteobacteria        | <i>uncultured</i>                       | 0.049          | -     |
|     | Otu0189   | Proteobacteria        | <i>Xanthobacteraceae_unclassified</i>   | 0.009          | -     |
|     | Otu0201   | Proteobacteria        | <i>Hyphomicrobiaceae_unclassified</i>   | 0.036          | -     |
|     | Otu0204   | Proteobacteria        | <i>Hyphomicrobium</i>                   | 0.042          | -     |
|     | Otu0206   | Proteobacteria        | <i>Enterobacteriaceae_unclassified</i>  | 0.046          | -     |
|     | Otu0229   | Proteobacteria        | <i>uncultured</i>                       | 0.041          | -     |
|     | Otu0258   | Proteobacteria        | <i>Arenimonas</i>                       | 0.048          | -     |
|     | Otu0271   | Proteobacteria        | <i>Deltaproteobacteria_unclassified</i> | 0.011          | -     |

|         |                 |                                         |       |   |
|---------|-----------------|-----------------------------------------|-------|---|
| Otu0314 | Proteobacteria  | <i>Xanthobacteraceae_unclassified</i>   | 0.009 | - |
| Otu0324 | Proteobacteria  | <i>Reyranella</i>                       | 0.001 | - |
| Otu0332 | Proteobacteria  | <i>Pedomicrobium</i>                    | 0.022 | - |
| Otu0334 | Proteobacteria  | <i>Phreatobacter</i>                    | 0.033 | - |
| Otu0412 | Proteobacteria  | <i>Gammaproteobacteria_unclassified</i> | 0.019 | - |
| Otu0503 | Proteobacteria  | <i>Pedomicrobium</i>                    | 0.030 | - |
| Otu0594 | Proteobacteria  | <i>Rickettsiaceae_unclassified</i>      | 0.010 | - |
| Otu0679 | Proteobacteria  | <i>Dechloromonas</i>                    | 0.038 | - |
| Otu1564 | Proteobacteria  | <i>Deltaproteobacteria_unclassified</i> | 0.030 | - |
| Otu0425 | Verrucomicrobia | <i>Verrucomicrobiaceae_unclassified</i> | 0.012 | - |

---
